# Supplementary material
Source: ML conference proceedings conference paper supplement (https://openreview.net/forum?id=AD5yx2xq8R)

(A)

**Entropy-BAC Relationship Curve During the Training Process on TUAB**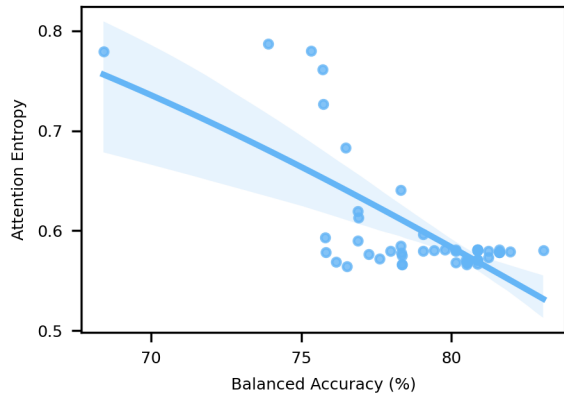

(B)

**Entropy-BAC Relationship Curve of Warm Up XAI on TUAB**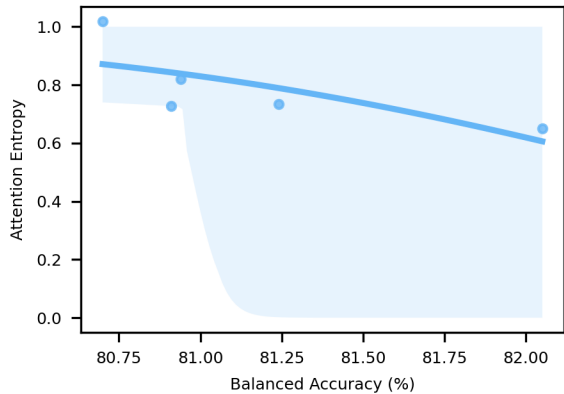

Supplement: supplementary_material [file attachment]
